# Supplementary material for: A combination of circulating microRNA-375-3p and chemokines CCL11, CXCL12, and G-CSF differentiate Crohn’s disease and intestinal tuberculosis
Source: PubMed Central journal article supplement (PMC8639680; doi:10.1038/s41598-021-02383-z), 2021-12-02
Supplement: 41598_2021_2383_MOESM1_ESM.pdf [file 41598_2021_2383_MOESM1_ESM.pdf]

## **A combination of circulating microRNA-375-3p and chemokines CCL11, CXCL12, and G-CSF differentiate Crohn's Disease and Intestinal Tuberculosis**

Susree Roy<sup>1#</sup>, Suchandrima Ghosh<sup>1#</sup>, Mallica Banerjee<sup>1</sup>, Sayantan Laha<sup>2</sup>, Dipanjan Bhattacharjee<sup>3</sup>, Rajib Sarkar<sup>4</sup>, Sujay Ray<sup>5</sup>, Arka Banerjee<sup>4</sup>, Ranajoy Ghosh<sup>6</sup>, Aniket Halder<sup>6</sup>, Alakendu Ghosh<sup>3</sup>, Raghunath Chatterjee<sup>2</sup>, Simanti Datta<sup>1</sup>, Gopal Krishna Dhali<sup>4</sup>, and Soma Banerjee<sup>1\*</sup>

# Both the authors have contributed equally.

<sup>1</sup>Center for Liver Research, Institute of Post Graduate Medical Education and Research, Kolkata

<sup>2</sup>Department of Human Genetics, Indian Statistical Institute, Kolkata

<sup>3</sup>Department of Rheumatology, Institute of Post Graduate Medical Education and Research, Kolkata

<sup>4</sup>Department of Gastroenterology, Institute of Post Graduate Medical Education and Research, Kolkata

<sup>5</sup>R.G. Kar Medical College and Hospital, Kolkata

<sup>6</sup>Department of Gastro-Pathology, Institute of Post Graduate Medical Education and Research, Kolkata

\*Corresponding Author : Soma Banerjee

Professor

Center for Liver Research

School of Digestive and Liver Diseases

Institute of Post Graduate Medical Education and Research

244, Acharya Jagadish Chandra Bose Road

Kolkata-700020

West Bengal, India.

Mobile No: 9748000673

E.mail: somabanerjee70@gmail.com

**Running title:** Biomarker to distinguish Intestinal Tuberculosis and Crohn's Disease

**Supplementary Table 1:** Clinical, demographical parameters of UC and Hemorrhoids patients included in the study.

| Variable | Normal<br>(n=3) | UC<br>(n=15) |
|----------|-----------------|--------------|
|----------|-----------------|--------------|

| <b>Baseline characteristics</b>         |               |                |
|-----------------------------------------|---------------|----------------|
| <b>Age(yr)<br/>(Mean±sd)</b>            | 42±18.7       | 42.7±10.8      |
| <b>Sex (F/M)</b>                        | 2/1           | 7/8            |
| <b>Fever (Y/N)</b>                      | 2/1           | 5/10           |
| <b>Pain Abdomen (Y/N)</b>               | 1/2           | 13/2           |
| <b>Weight Loss (Y/N)</b>                | 0/3           | 6/9            |
| <b>Clinical characteristics</b>         |               |                |
| <b>Hemoglobin (gm/dl)<br/>(Mean±sd)</b> | 11.6±2.7      | 10.1±1.5       |
| <b>ESR (mm)<br/>(Median, Range)</b>     | 40<br>(35-42) | 35<br>(12-150) |
| <b>CRP(mg/dl)<br/>(Median, Range)</b>   | 4.3<br>(2-36) | 6<br>(1.5-36)  |

**Supplementary Table 2:** Extracted data from Next Generation Sequence analysis of CD, ITB and hemorrhoids (Normal) samples.

| <b>Sample</b> | <b>Raw Reads</b> | <b>Mapping to hg19 (%)</b> | <b>Mapping to mature miRNA (%)</b> |
|---------------|------------------|----------------------------|------------------------------------|
| CD1           | 33544611         | 98.17%                     | 74.31%                             |
| CD2           | 26315327         | 98.50%                     | 66.94%                             |
| CD3           | 23860962         | 98.61%                     | 72.58%                             |
| ITB1          | 23922043         | 97.80%                     | 71.87%                             |
| ITB2          | 32273807         | 98.45%                     | 62.92%                             |
| ITB3          | 27313209         | 98.64%                     | 46.05%                             |
| N1            | 27214031         | 92.13%                     | 49.76%                             |
| N2            | 25868238         | 98.11%                     | 59.31%                             |
| N3            | 27058058         | 97.14%                     | 75.57%                             |

**Supplementary Table 3:** Sequences of the Primers used in the study.

| <b>Name of the gene</b> | <b>5'- 3' direction</b> |
|-------------------------|-------------------------|
|                         |                         |

---

|             |                                        |
|-------------|----------------------------------------|
| miR-31-5p   | <u>ACACTCCAGCTGGGAGGCAAGATGCTGGCA</u>  |
| miR-215-5p  | <u>ACACTCCAGCTGGGATGACCTATGAATTGA</u>  |
| miR-375-3p  | <u>ACACTCCAGCTGGGTTTGTTCGTTTCGGCTC</u> |
| miR-29a-3p  | <u>ACACTCCAGCTGGGTAGCACCATCTGAAAT</u>  |
| miR-615-3p  | <u>ACACTCCAGCTGGGTCCGAGCCTGGGTCTC</u>  |
| MTB IS6110F | CCT GCG AGC GTA GGC GTC GG             |
| MTB IS6110R | CTCGTCCAGCGCCGCTTCGG                   |
| MPB64 F     | TCCGCTGCCAGTCGTCTTCC                   |
| MPB64R      | GTCCTCGCGAGTCTAGGCCA                   |

---

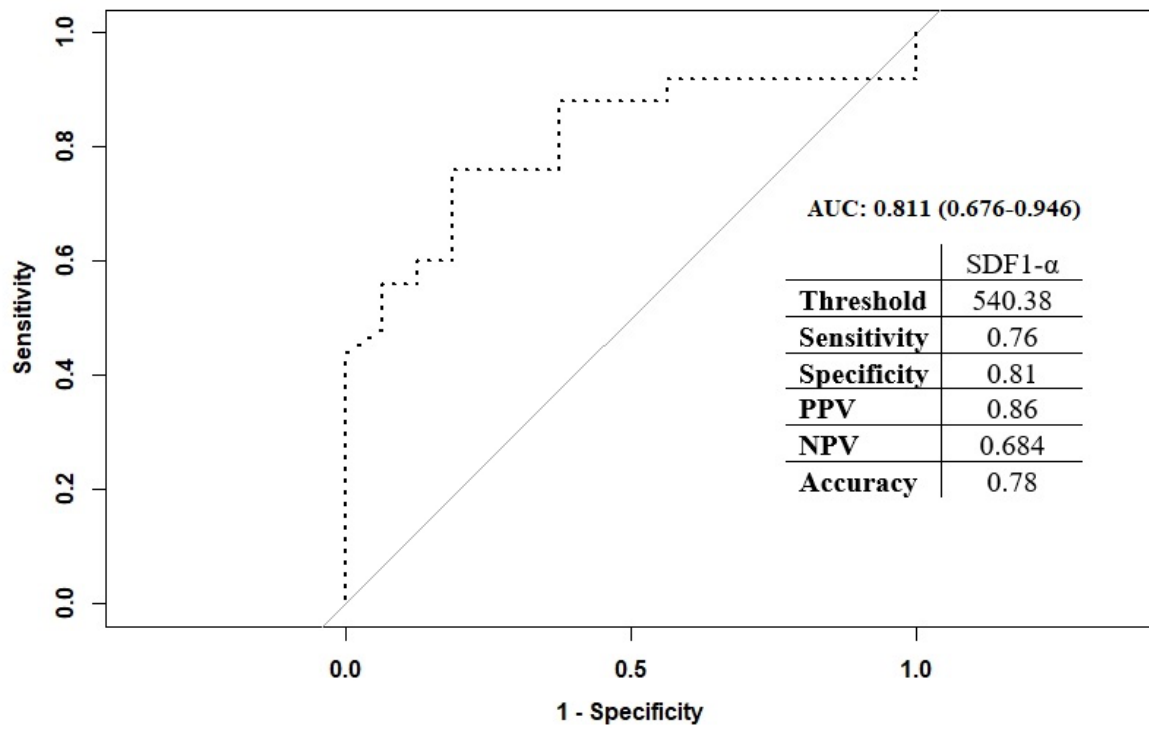

**Supplementary Figure 1**

**Supplementary Figure 1:** ROC analysis for SDF-1 $\alpha$ /CXCL12 in differentiating CD and UC.
